# Supplementary material
Source: PubMed Central journal article supplement (PMC4397985)

**Supplemental Figure 1a:** Tree with first split forced to be on naltrexone in COMBINE training sample.

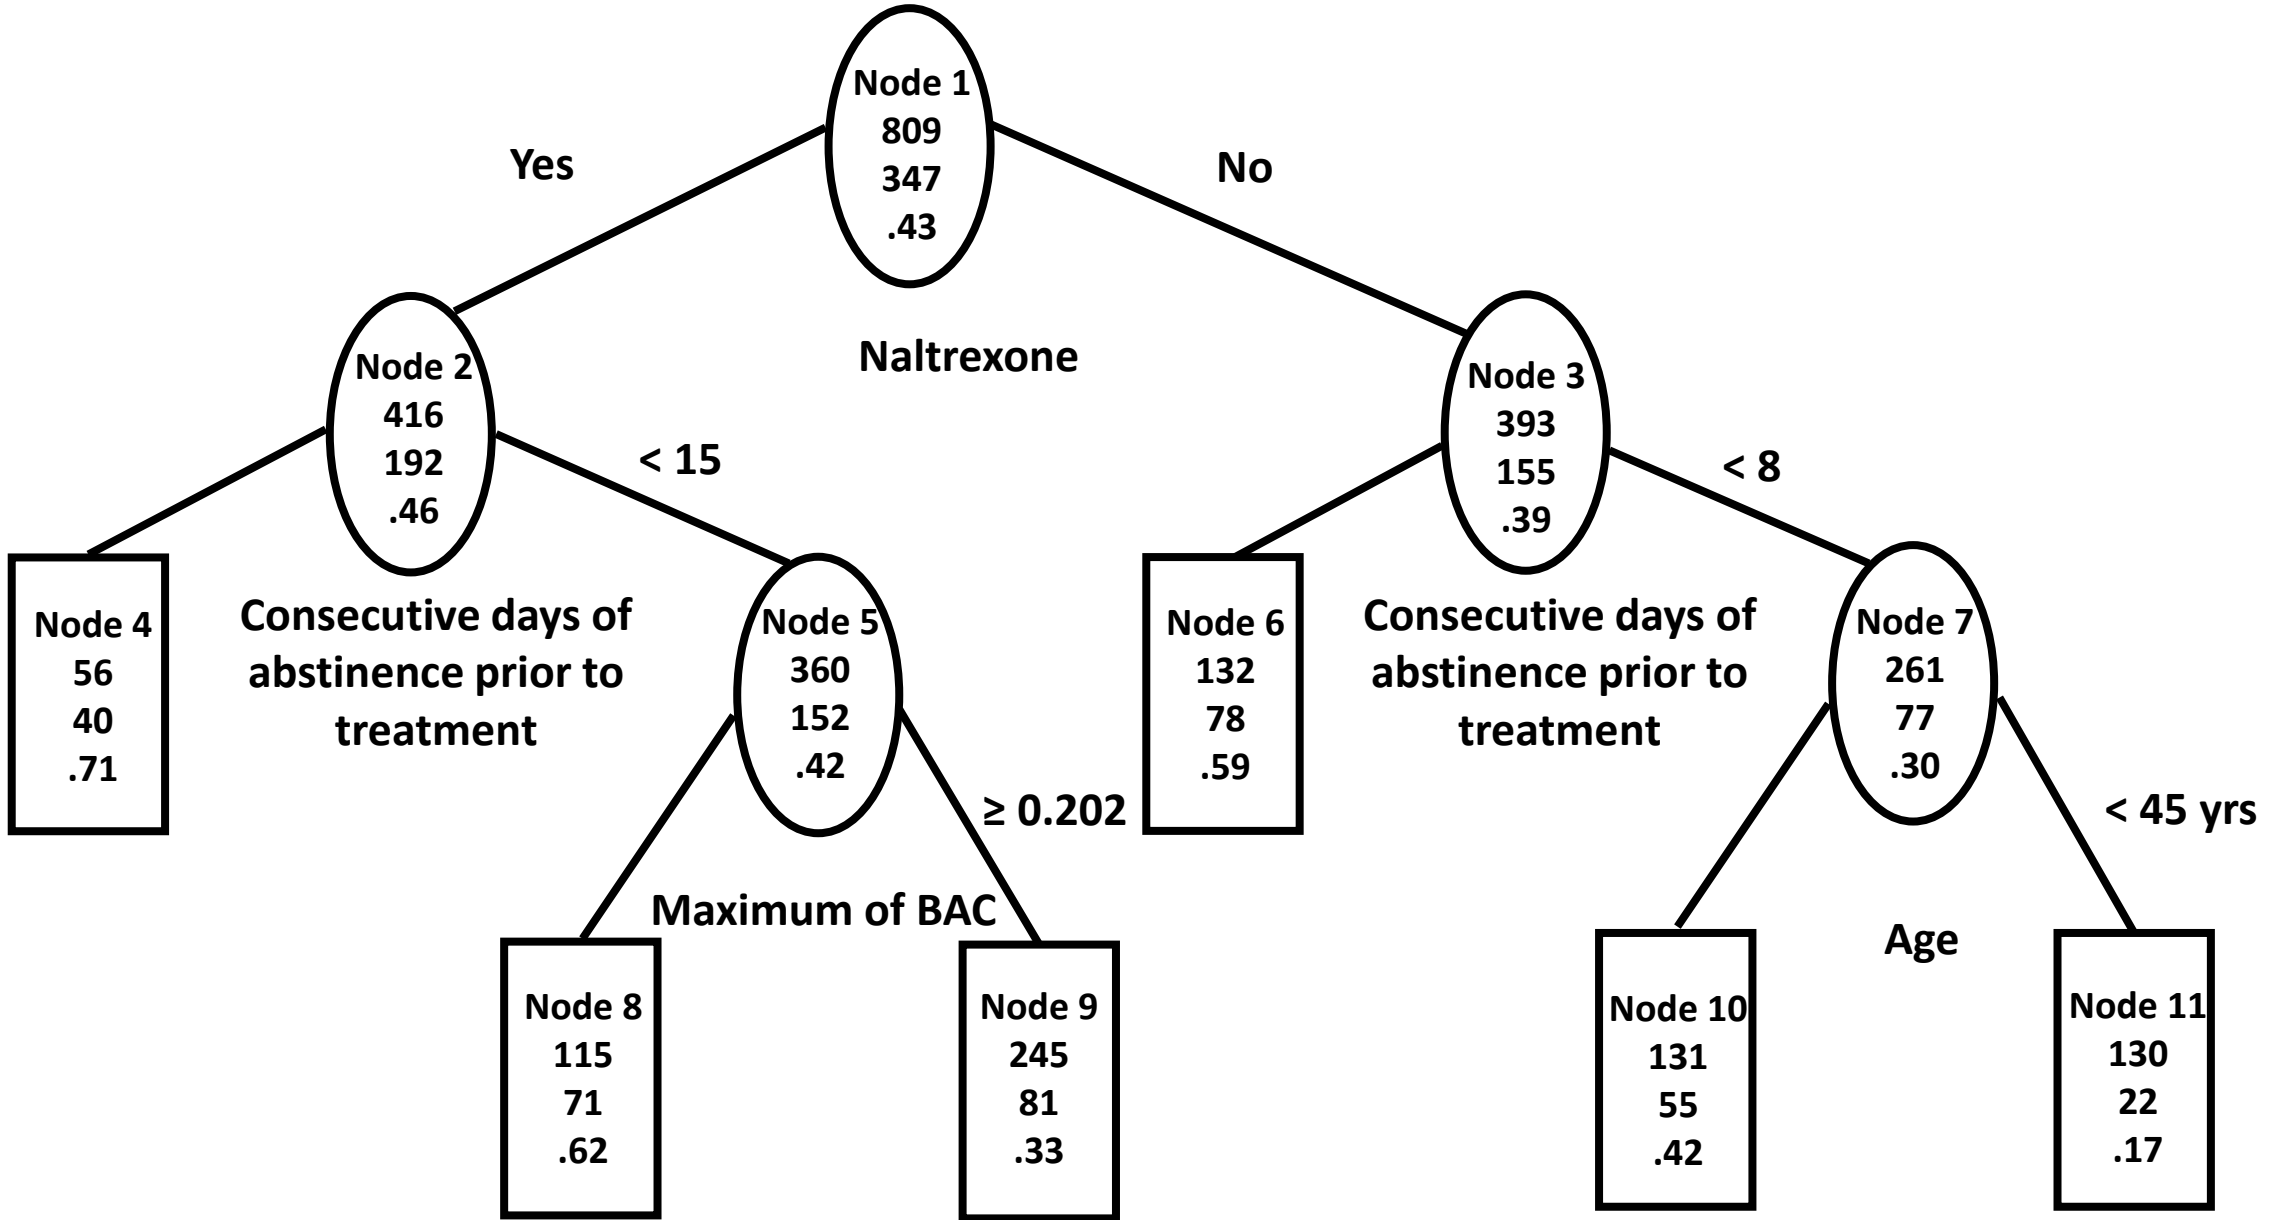

**Supplemental Figure 1b:** Tree with first split forced to be on naltrexone and third split within the naltrexone group forced to be on age in the COMBINE training sample.

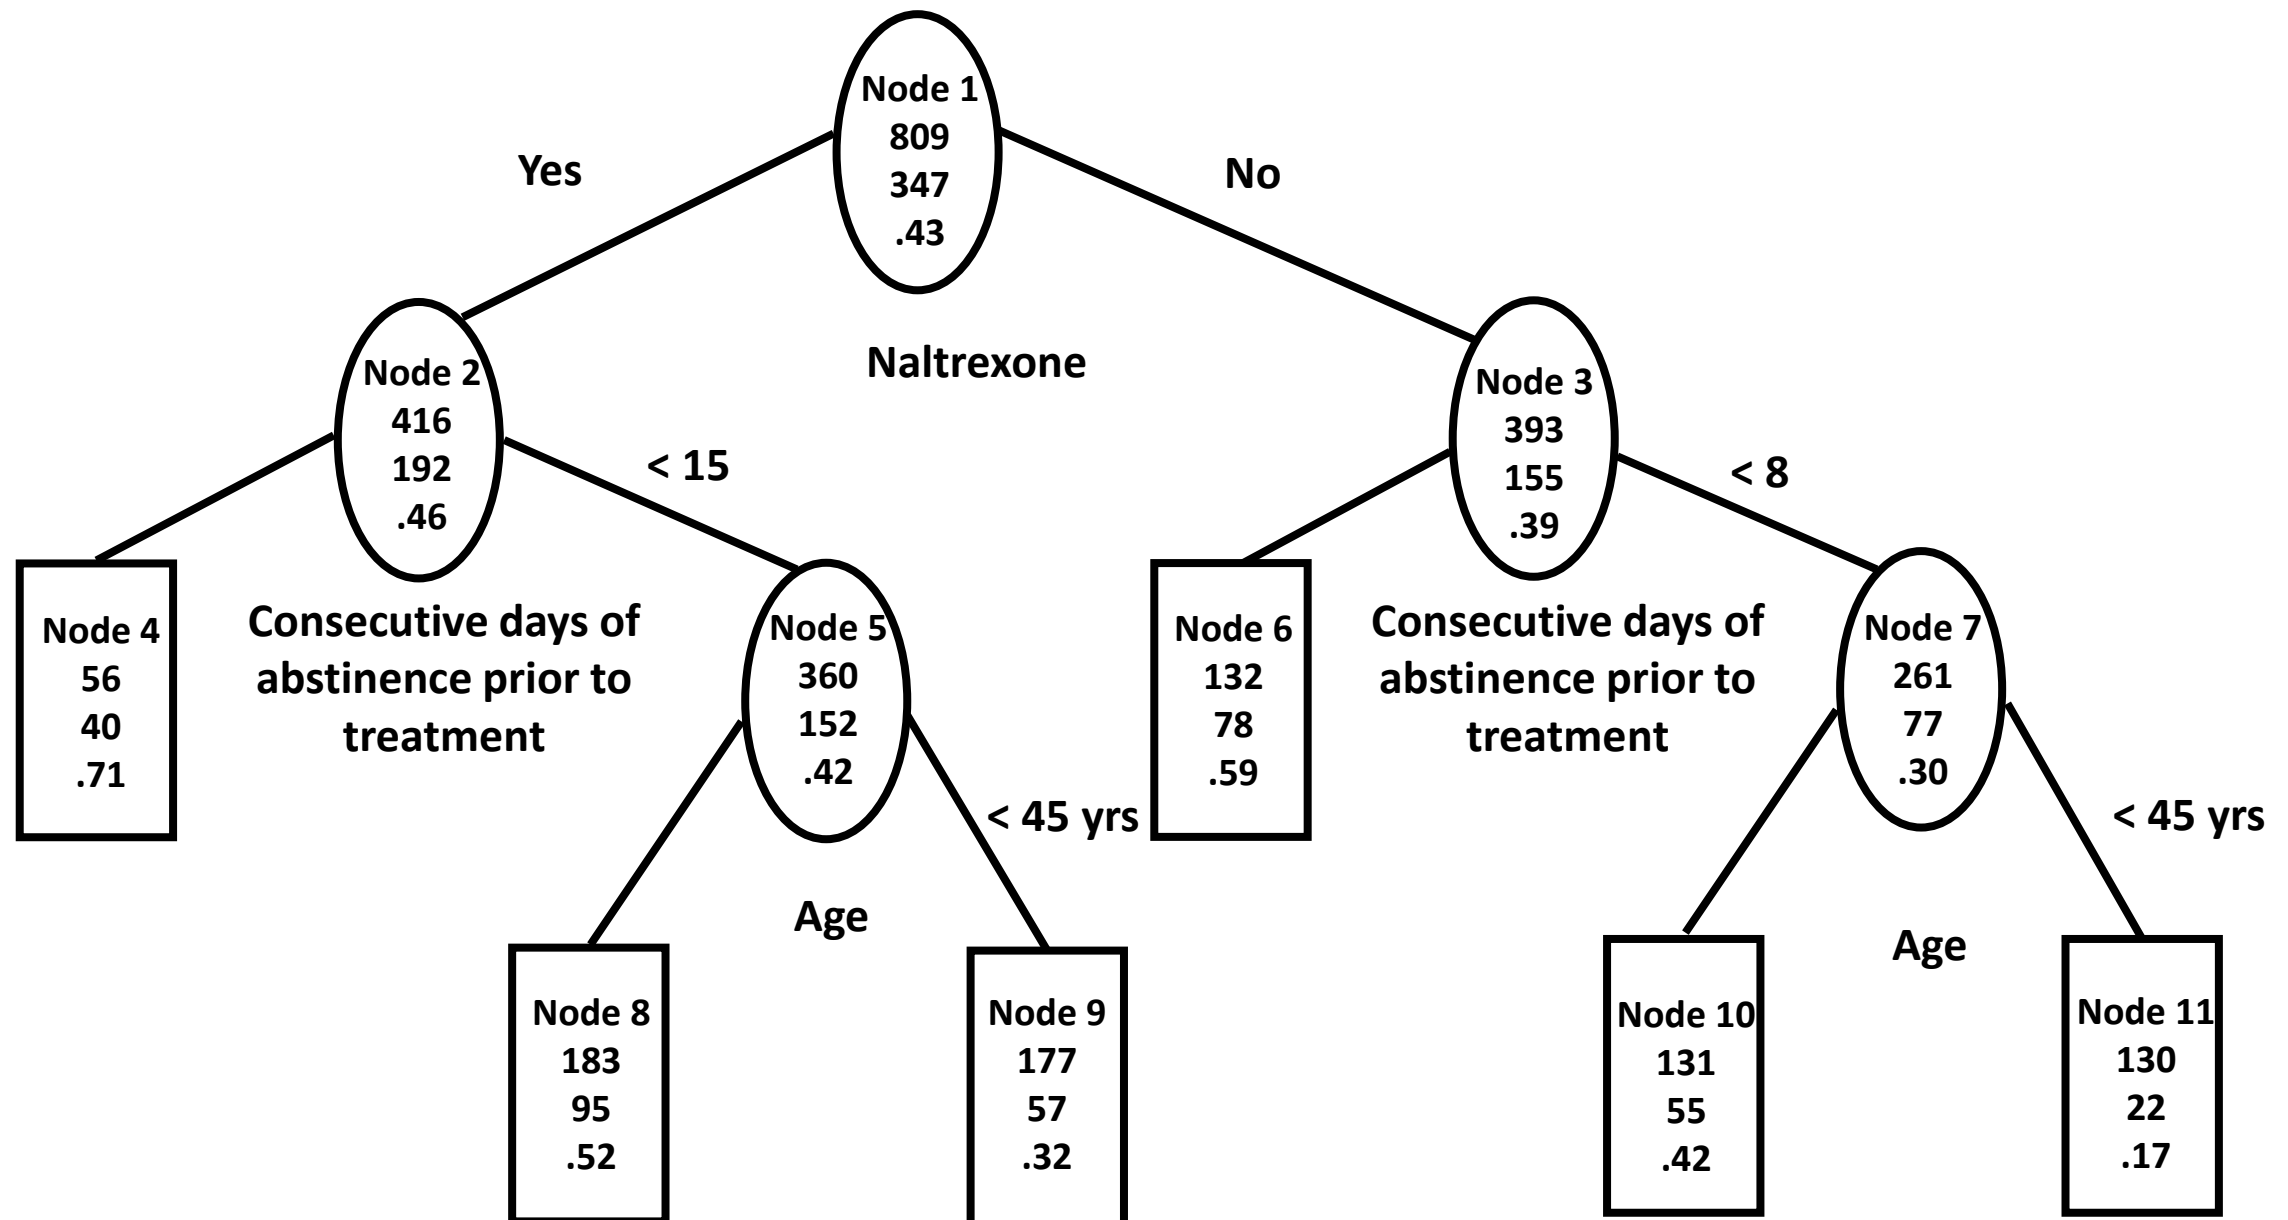

Supplement: NIHMS677602-supplement-Supp_FigureS1.pdf [file NIHMS677602-supplement-Supp_FigureS1.pdf]
